# Supplementary material
Source: PubMed Central journal article supplement (PMC6258334)
Supplement: NIHMS971419-supplement-supplement_1.pdf [file NIHMS971419-supplement-supplement_1.pdf]

## Supplement

### PCR and Sanger Sequencing

| Forward Sequence                                    | Location | Reverse Sequence       | Location | Expected Band Size (bp) |
|-----------------------------------------------------|----------|------------------------|----------|-------------------------|
| <b>Genomic DNA- Variant Validation</b>              |          |                        |          |                         |
| GACTTTGTGTAAACTTCGCGG                               | Intron 1 | AAGAAACAAGTCACTCGTCTGA | Intron 2 | 407                     |
| <b>cDNA – Canonical Transcript/ Exon 2 Skipping</b> |          |                        |          |                         |
| CAGTTTAATTCTCCGGCGGC                                | Exon 1   | ACATGTCTGTCTGTGGTGGT   | Exon 5   | 601                     |
| <b>cDNA – Intron Retention</b>                      |          |                        |          |                         |
| AGTCTCTTTCAGTCGGGAA                                 | Intron 1 | TGCCATCAATTCAGCCTGC    | Exon 3   | 345                     |

### Next Generation Sequencing\*

| Forward Sequence                                    | Location | Reverse Sequence    | Location | Expected Band Size (bp) |
|-----------------------------------------------------|----------|---------------------|----------|-------------------------|
| <b>cDNA – Canonical Transcript/ Exon 2 Skipping</b> |          |                     |          |                         |
| CTGCAGATTGACGGGACGAGAT                              | Exon 1   | TGCCATCAATTCAGCCTGC | Exon 3   | 346                     |
| <b>cDNA – Intron Retention</b>                      |          |                     |          |                         |
| TAGTCTCTTTCAGTCGGGAA                                | Intron 1 | TGCCATCAATTCAGCCTGC | Exon 3   | 346                     |

\*Standard Illumina adaptors plus unique barcodes were added to each NextGen primer

**Supplemental Figure S1.** Genomic DNA Chromatogram. Sanger sequencing of DNA from the proband validated 2 variants in *RTTN*: c.32-3C>T and c.190G>T; p.V64F indicated by black arrows. The c.190G>T; p.V64F variant is inherited from the mother and the c.32-3C>T variant is inherited from the father.

**Supplemental Figure S2.** We designed primers to amplify cDNA region from exon 1 to exon 5 (wild type transcript). **S2a.** All 3 samples (proband, mother (M), and father (F)) revealed an expected band size of 601 bp (wild type transcript) as well as a lighter, smaller band at 407 bp (transcript lacks exon 2)

**S2b.** PCR amplification of cDNA using a primer pair designed to identify a cryptic splice site in intron 1 revealed bands only in the samples from the proband and father. Gel purification and sequencing of these bands demonstrated aberrant splicing and retention of intron 1.

**Supplemental Figure S3.** Sequence chromatograms of gel purified PCR bands from the proband in Figure 2 (main text).

**S3a.** Upper band (601 bp): Sequence demonstrates canonical exon 1-exon 2 splicing.

**S3b.** Lower band (407 bp) Sequence demonstrates exon 1- exon 3 sequence indicating aberrant splicing and exon 2 skipping.

**S3c.** Sequence demonstrates intron 1 retention indicating aberrant splicing from upstream cryptic splice site

**S3d.** Sequence demonstrates canonical exon 2-3 splicing indicating this is cDNA and not genomic DNA contamination.

**Supplemental Figure S4.** Canonical and aberrant splicing of *RTTN*

Schematic representation of canonical splicing and aberrant splicing resulting in exon 2 skipping or intron 1 retention.

**Supplemental Table.** Next Generation Sequencing of PCR Products from Amplification of cDNA Region Exons 1-5 of *RTTN*

| <b>Sample</b> | <b>Coverage (x)</b> | <b>WT Transcript</b> | <b>Aberrantly Spliced Transcript</b> |
|---------------|---------------------|----------------------|--------------------------------------|
| Proband       | 8977                | 0.29                 | 0.71                                 |
| Mother        | 682                 | 0.71                 | 0.29                                 |
| Father        | 2374                | 0.39                 | 0.61                                 |
| Control 1     | 2003                | 0.62                 | 0.38                                 |
| Control 2     | 349                 | 1.0                  | 0                                    |
| Control 3     | 1515                | 0.80                 | 0.20                                 |
| Control 4     | 1769                | 0.77                 | 0.23                                 |

### Genomic DNA Chromatogram

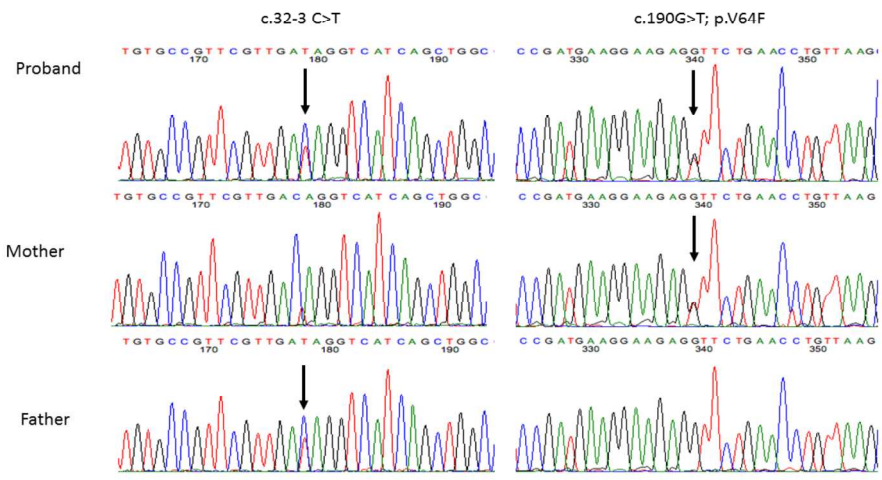

Supplemental Figure S1. Genomic DNA Chromatogram. Sanger sequencing of DNA from the proband validated 2 variants in RTTN: c.32-3C>T and c.190G>T; p.V64F indicated by black arrows. The c.190G>T; p.V64F variant is inherited from the mother and the c.32-3C>T variant is inherited from the father.

279x157mm (300 x 300 DPI)

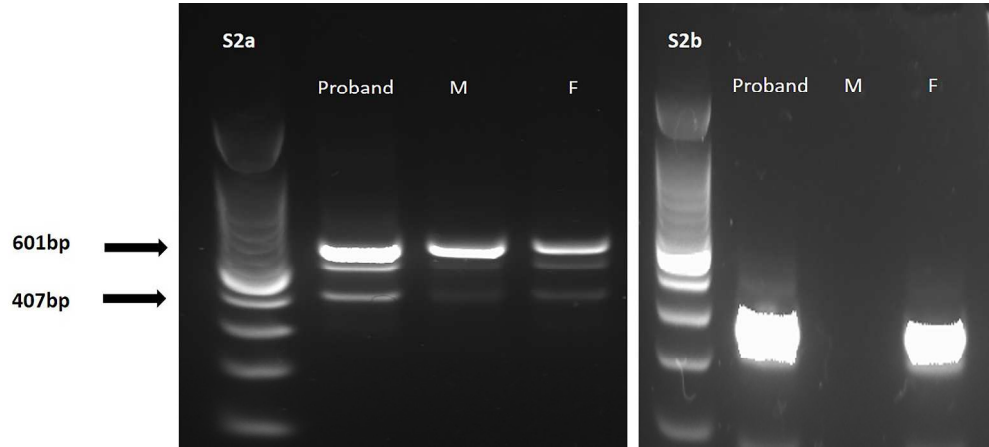

Supplemental Figure S2. We designed primers to amplify cDNA region from exon 1 to exon 5 (wild type transcript). S2a. All 3 samples (proband, mother (M), and father (F) revealed an expected band size of 601 bp (wild type transcript) as well as a lighter, smaller band at 407 bp (transcript lacks exon 2)

S2b. PCR amplification of cDNA using a primer pair designed to identify a cryptic splice site in intron 1 revealed bands only in the samples from the proband and father. Gel purification and sequencing of these bands demonstrated aberrant splicing and retention of intron 1.

221x97mm (600 x 600 DPI)

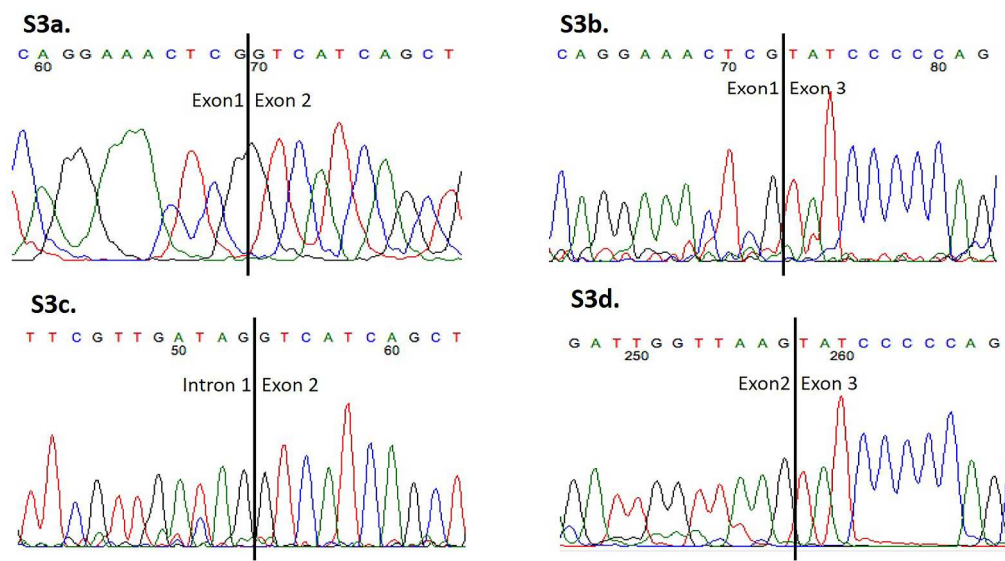

Supplemental Figure S3. !! + Sequence chromatograms of gel purified PCR bands from the proband in Figure 2 (main text). S3a. Upper band (601 bp): Sequence demonstrates canonical exon 1-exon 2 splicing. S3b. Lower band (407 bp) Sequence demonstrates exon 1- exon 3 sequence indicating aberrant splicing and exon 2 skipping. S3c. Sequence demonstrates intron 1 retention indicating aberrant splicing from upstream cryptic splice site. S3d. Sequence demonstrates canonical exon 2-3 splicing indicating this is cDNA and not genomic DNA contamination. !! +

229x129mm (600 x 600 DPI)

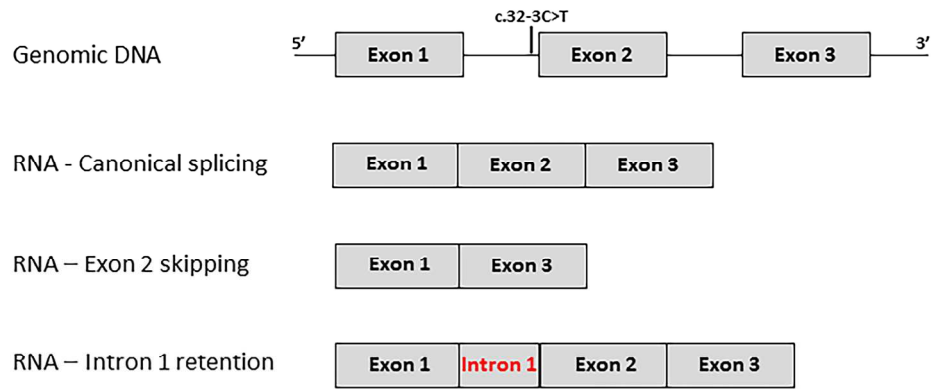

Supplemental Figure S4. Canonical and aberrant splicing of RTTN  
Schematic representation of canonical splicing and aberrant splicing resulting in exon 2 skipping or intron 1 retention.

188x91mm (600 x 600 DPI)
